# Supplementary figures and images for: A novel reaction of 2-phenacyl mercaptoimidazole with acetic anhydride: formation of an imidazothiazole with loss of a phenyl group
Source: Springer Nature journal article supplement (doi:10.1007/s12039-020-01824-y), 2020-09-05

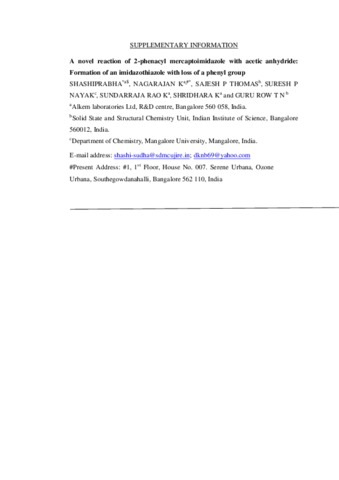

Supplement: MOESM1 [file 12039_2020_1824_MOESM1_ESM.pdf]
